# Supplementary material
Source: MDPI journal article supplement (https://www.mdpi.com/2076-3417/11/11/5131)
Supplement: s1 [file s1]

Table S3. ICP-OES analysis and describing heavy metal composition.

| Elements<br>(ppm) | C1        | C2        | C3        | C5        | C6        | C7        | A1        | A2        | A3        | A4        | A5        |
|-------------------|-----------|-----------|-----------|-----------|-----------|-----------|-----------|-----------|-----------|-----------|-----------|
| Cd                | 0         | 0.141     | 0         | 0         | 0         | 0         | 0         | 0         | 0         | 0         | 0         |
| Pb                | 1.635     | 0.283     | 0         | 1.633     | 0.956     | 0.711     | 2.533     | 2.700     | 1.372     | 1.794     | 0         |
| As                | 2.864     | 0         | 0         | 0         | 0         | 0         | 4.000     | 4.052     | 2.883     | 3.264     | 0         |
| Hg                | 0         | 0         | 0         | 0         | 0         | 0         | 0         | 0         | 0         | 0         | 0         |
| Co                | 1.091     | 0.848     | 2.556     | 0.817     | 1.775     | 0.855     | 2.533     | 1.755     | 1.648     | 3.101     | 0         |
| Ni                | 3.273     | 2.119     | 4.709     | 2.450     | 4.645     | 2.280     | 6.798     | 4.592     | 3.983     | 7.181     | 1.563     |
| Cu                | 3.273     | 1.978     | 2.691     | 1.225     | 2.049     | 1.281     | 12.266    | 5.131     | 2.059     | 14.855    | 38.713    |
| Al                | 6228.807  | 3100.506  | 9204.475  | 5710.728  | 10039.542 | 4898.466  | 7437.410  | 8614.321  | 4142.335  | 7394.884  | 577.433   |
| Ba                | 25.298    | 1.978     | 2.287     | 20.144    | 7.104     | 11.256    | 32.129    | 49.159    | 19.913    | 25.628    | 3.993     |
| Cr                | 14.592    | 5.509     | 16.285    | 10.888    | 16.257    | 8.692     | 13.066    | 13.235    | 7.415     | 11.753    | 1.389     |
| Fe                | 4050.061  | 2134.576  | 6325.601  | 3665.492  | 7352.527  | 2860.927  | 7450.390  | 6543.191  | 6320.401  | 5425.067  | 322.683   |
| Mn                | 29.319    | 4.125     | 77.254    | 29.265    | 52.046    | 20.436    | 114.919   | 117.630   | 213.688   | 94.516    | 20.311    |
| Mo                | 0         | 0         | 0         | 0         | 0         | 0         | 0         | 0         | 0         | 0         | 0         |
| Zn                | 26.591    | 8.900     | 11.575    | 16.469    | 12.568    | 5.272     | 35.463    | 34.303    | 9.476     | 71.988    | 19.790    |
| Se                | 0         | 0         | 0         | 0         | 0         | 0         | 0         | 0         | 0         | 0         | 2.082     |
| Rb                | 15.955    | 7.487     | 14.401    | 10.209    | 12.157    | 7.409     | 5.199     | 24.985    | 6.317     | 105.616   | 29.685    |
| Sn                | 0         | 0         | 0         | 0         | 0.411     | 0.426     | 1.467     | 0.270     | 0.411     | 1.143     | 0.868     |
| Sr                | 400.995   | 332.197   | 198.088   | 265.616   | 307.470   | 390.760   | 272.575   | 408.949   | 187.073   | 322.920   | 135.867   |
| Li                | 10.908    | 33.905    | 28.532    | 7.349     | 14.480    | 6.127     | 21.597    | 17.693    | 7.828     | 35.260    | 13.367    |
| Ag                | 0         | 0         | 0         | 0         | 0         | 0         | 0         | 0         | 0         | 0.652     | 0         |
| Na                | 735.160   | 733.602   | 6299.189  | 438.265   | 133.682   | 83.734    | 7735.945  | 5092.080  | 2712.561  | 16953.336 | 2972.083  |
| Mg                | 2045.080  | 4484.661  | 7646.186  | 1739.780  | 3061.325  | 1674.689  | 4283.325  | 6622.343  | 3754.826  | 15645.507 | 2547.500  |
| K                 | 5132.751  | 3681.851  | 2112.936  | 4037.352  | 3529.213  | 2121.273  | 34681.957 | 5052.504  | 1202.613  | 59126.776 | 32557.048 |
| Ca                | 15037.356 | 23848.983 | 28669.894 | 23214.776 | 49181.726 | 12950.929 | 16847.747 | 17268.220 | 22101.361 | 6829.772  | 8525.633  |
