# Supplementary material
Source: MDPI journal article supplement (https://www.mdpi.com/2076-3417/11/11/5131)
Supplement: s1 [file Suppl. Mat. 3.xlsx]

## Sheet: Genera
	OMW	OMP
Clostridium	16	0
Chryseolinea	1	0
Chryseobacterium	1	0
Turicibacter	5	0
Bacteroides	9	0
Spiroplasma	296	0
Prolixibacter	1	0
Fusobacterium	3	1
Romboutsia	0	1
Lactobacillus	95	3
Cytophaga	1	0
Enterococcus	0	3
Sporocytophaga	1	0
Adhaeribacter	0	1
Truepera	0	1
Prevotella	3627	3
Olsenella	120	0
Dielma	45	0
Holdemania	18	0
Spirochaeta	20	0
Brevibacterium	12	0
Adlercreutzia	10	0
Eggerthella	8	0
Gordonibacter	7	0
Solobacterium	6	0
Ruminococcus	7	0
Denitrobacterium	7	0
Acetobacter	8	83
Treponema	5	0
Sphaerochaeta	6	0
Alkaliphilus	3	0
Proteiniphilum	3	0
Caloramator	2	0
Portibacter	2	0
Megasphaera	3	0
Gluconobacter	3	29
Catenisphaera	2	0
Enterobacter	2	0
Selenomonas	1	0
Pseudoramibacter	1	0
Catenibacterium	1	1
Collinsella	1	0
Stygiolobus	1	0
Sedimentibacter	1	0
Alistipes	1	0
Bifidobacterium	1	0
Tyzzerella	1	0
Faecalibacterium	1	0
Syntrophococcus	2	0
Atopobium	1	0
Blautia	1	0
Marinilabilia	1	0
Peptostreptococcus	1	0
Eubacterium	2	0
Brevibacillus	1	0
Geobacter	1	0
Luteimonas	1	0
Sporolactobacillus	1	0
Dialister	1	0
Taibaiella	1	0
Blattabacterium	1	0
Gortzia	0	23
Nardonella	0	9
Komagataeibacter	0	2
Gluconacetobacter	0	2
Megamonas	0	1
Tepidimicrobium	0	1
Ameyamaea	0	1
Erwinia	0	1
Sutterella	0	1
