# Supplementary material
Source: MDPI journal article supplement (https://www.mdpi.com/2076-3417/11/11/5131)
Supplement: s1 [file Suppl. Mat. 4.xlsx]

## Sheet: Sheet1
	OMP	OMW
Nakazawaea	29928	4395
Saccharomyces	6731	661
Lachancea	3580	439
Candida	3346	386
Citeromyces	228	40
Alternaria	124	306
Trigonosporomyces	68	106
Mucor	32	5
Fusarium	21	69
Didymella	9	0
Phaeosphaeria	5	0
Devriesia	5	0
Neocosmospora	3	0
Cladosporium	3	0
Agaricus	2	0
Dipodascus	2	0
Toxicocladosporium	2	0
Wickerhamomyces	2	0
Aureobasidium	1	0
Rhizopus	1	0
Curvularia	1	0
Rhodotorula	1	0
Quambalaria	2	6
Mortierella	1	0
Podospora	1	0
unclassified Fungi	70	130
unclassified Hypocreales	11	13
unclassified Chaetothyriales	2	0
unclassified Pleosporales	4	0
unclassified Sporormiaceae	1	0
unclassified Ascomycota	3	21
unclassified Pyronemataceae	1	0
unclassified Pleosporaceae	16	111
unclassified Eurotiales	30	1
unclassified Capnodiales	28	0
unclassified Elsinoaceae	3	0
unclassified Eurotiomycetes	11	23
Monascus	0	46
Hyphopichia	0	10
Daedaleopsis	0	9
Eremothecium	0	4
Talaromyces	0	4
Aspergillus	0	1
Hortaea	0	1
Olpidium	0	1
unclassified Cortinariaceae	0	1
unclassified Rutstroemiaceae	0	7
unclassified Malasseziales	0	4
unclassified Teloschistaceae	0	3
unclassified Herpotrichiellaceae	0	2
unclassified Helotiales	0	1
